# Supplementary material for: Treatment with progesterone attenuates proliferation of endometrial polyps (EP) via regulation of expression of miR-320b and its target gene, MCL1
Source: PubMed Central journal article supplement — Arch Med Sci. 2023 Nov 7;19(6):1934–9. doi: 10.5114/aoms/171308 (PMC10696965; doi:10.5114/aoms/171308), 2023-11-07
Supplement: AMS-19-6-171308-s1.pdf [file AMS-19-6-171308-s1.pdf]

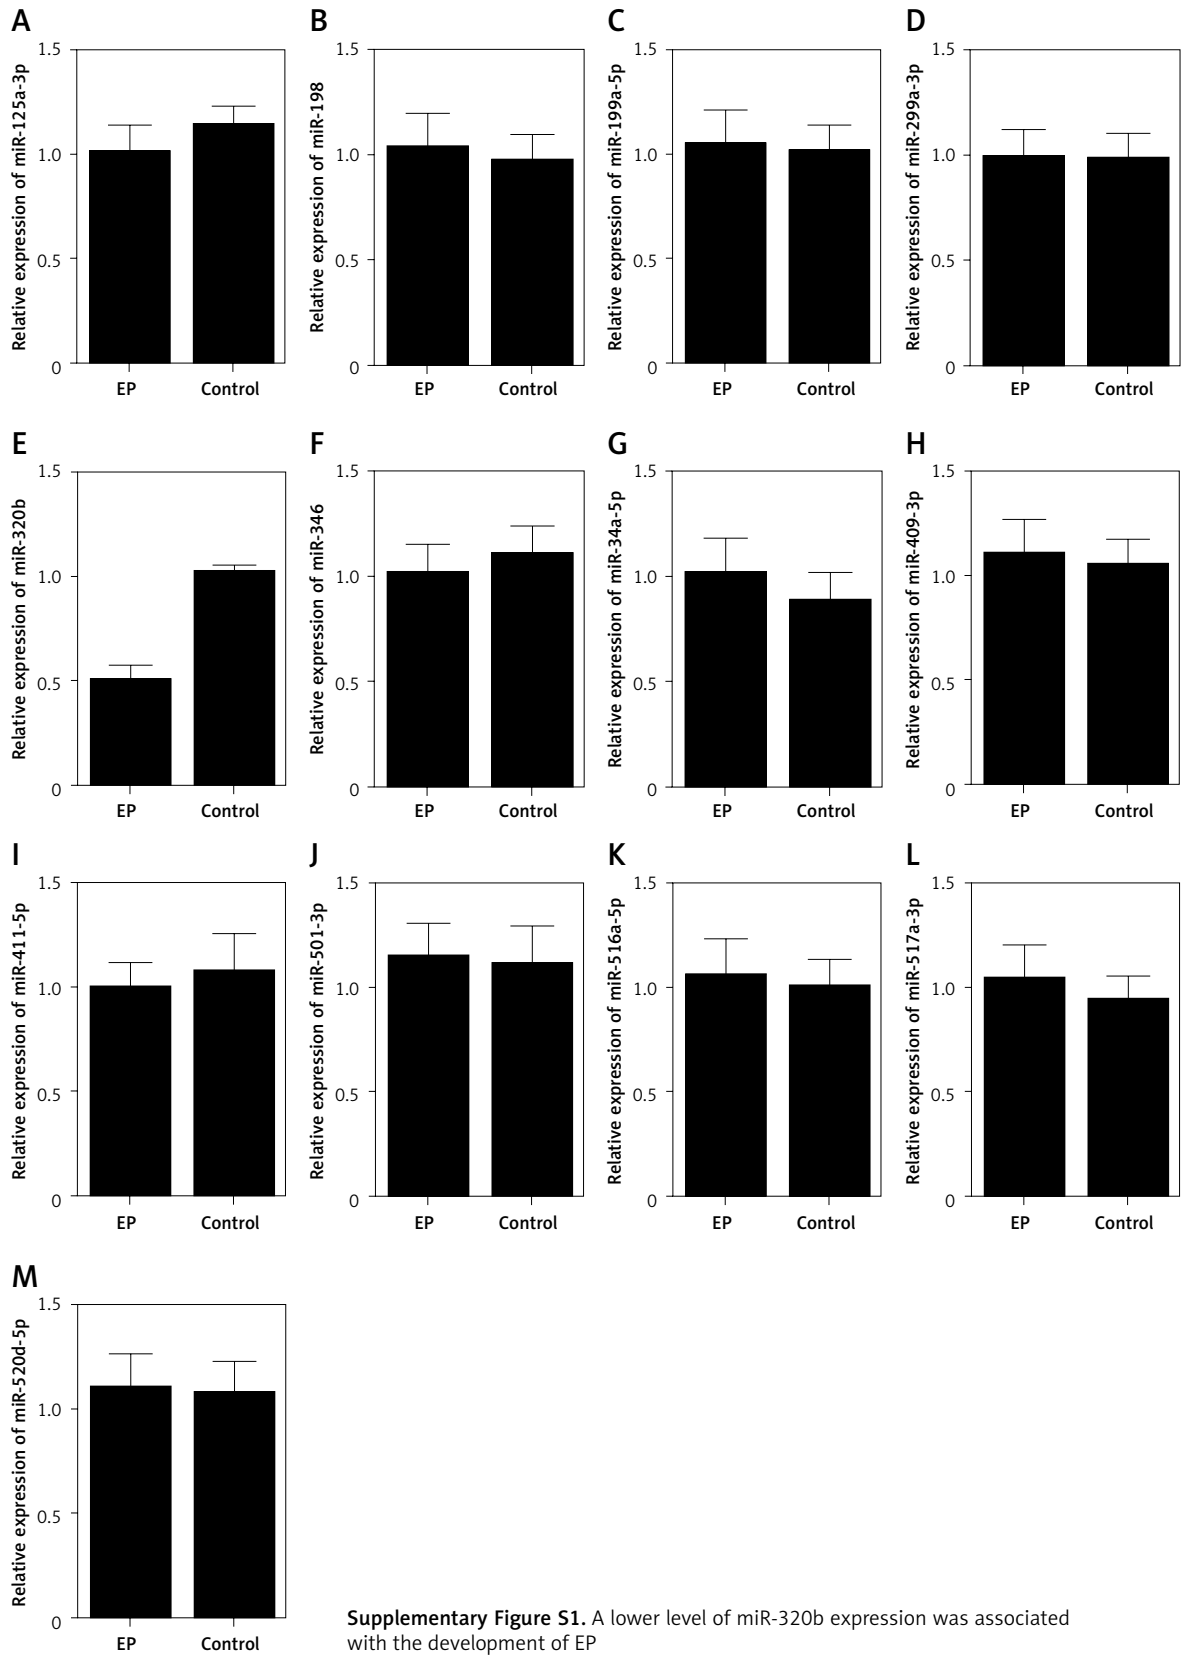

Supplementary Figure S1. A lower level of miR-320b expression was associated with the development of EP
